# Supplementary material for: Spin-Space-Encoding Magnetic Resonance Imaging: A New Application for Rapid and Sensitive Monitoring of Dynamic Swelling of Confined Hydrogels
Source: MDPI journal article supplement (doi:10.3390/molecules28073116), 2023-03-30
Supplement: s1 [file s1]

## Support Information

### Supplementary S1

#### The principle of the volumetric method

The current mainstream ways of measuring swelling include the mass method, which evaluates the ratio of the change in mass of a formula sample by the ratio of the change in mass before and after swelling. In the mass of the specimen,  $m$ , to the original mass of the specimen before it was swollen is the degree of swelling of the polymer measured. The formula for the degree of swelling is  $Q = (m - m_0)/m_0$ . In this formula,  $Q$  is the degree of swelling,  $m$  is the mass after swelling, and  $m_0$  is the mass of the cross-linked polymer before swelling. However, in the swelling process, the surface of the material must be dried and separated from the solvent before weighing. In addition, there are a series of methods for measuring the swelling of cross-linked polymers based on altered masses such as centrifugation, filtration, tea bagging and Prudential dextrin methods.

The formula for the degree of swelling is  $Q = \rho \Delta V / m_0$ . In this formula,  $\Delta V$  is the change in volume of the cross-linked polymer specimen,  $\rho$  is the solvent density and  $m_0$  is the mass of the cross-linked polymer is the cross-linked polymer specimen before swelling. Alternatively, the swelling is expressed directly as a ratio of volumes, making the formula for the degree of swelling become.  $Q = \Delta V / V_0$ . In this formula,  $\Delta V$  is the change in volume of the cross-linked polymer specimen, and  $V_0$  is the volume of the cross-linked polymer specimen before swelling. The volumetric method can obtain the results by measuring the volume change of the solvent or the cross-linked polymer specimen. Thus, the degree of swelling can be obtained by separating the swollen cross-linked polymer from the solvent and measuring the volume change of the solvent, or by measuring the volume change of the cross-linked polymer specimen using a swelling meter.

### Supplementary S2

#### The $^1\text{H}$ NMR spectrum of PEGA

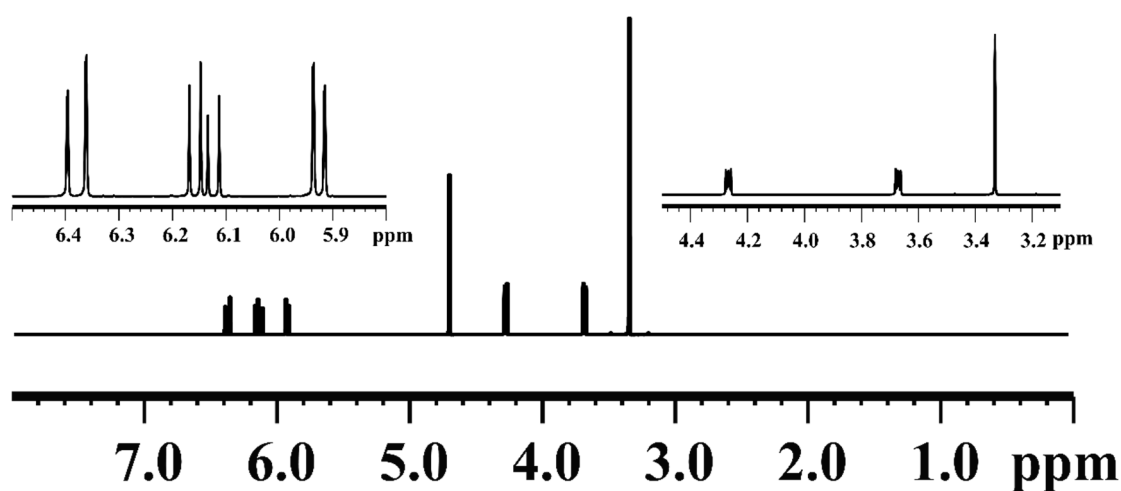

Figure S1: The  $^1\text{H}$  NMR spectrum of PEGA

## Supplementary S3

The  $^1\text{H}$  NMR spectrum of AM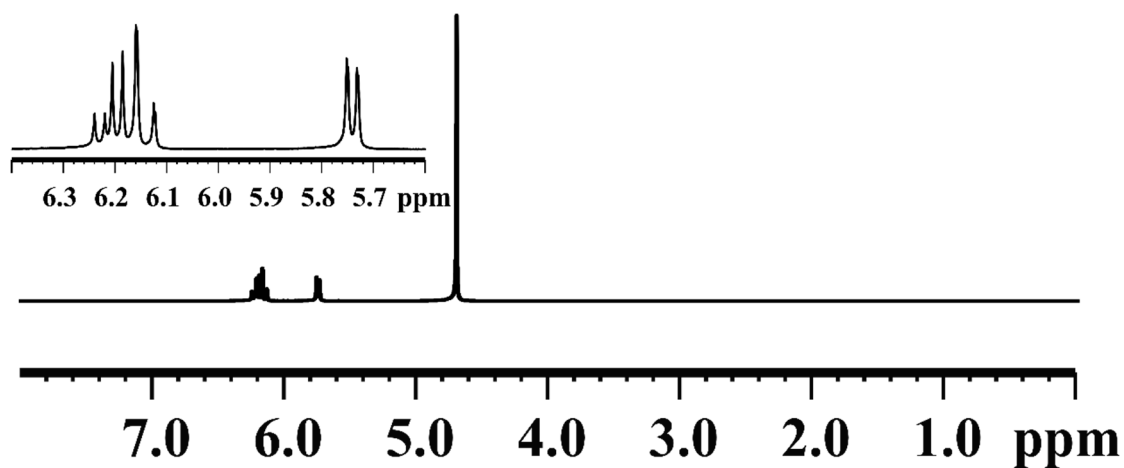Figure S2: The  $^1\text{H}$  NMR spectrum of AM

## Supplementary S4

The  $^1\text{H}$  NMR spectrum of MEA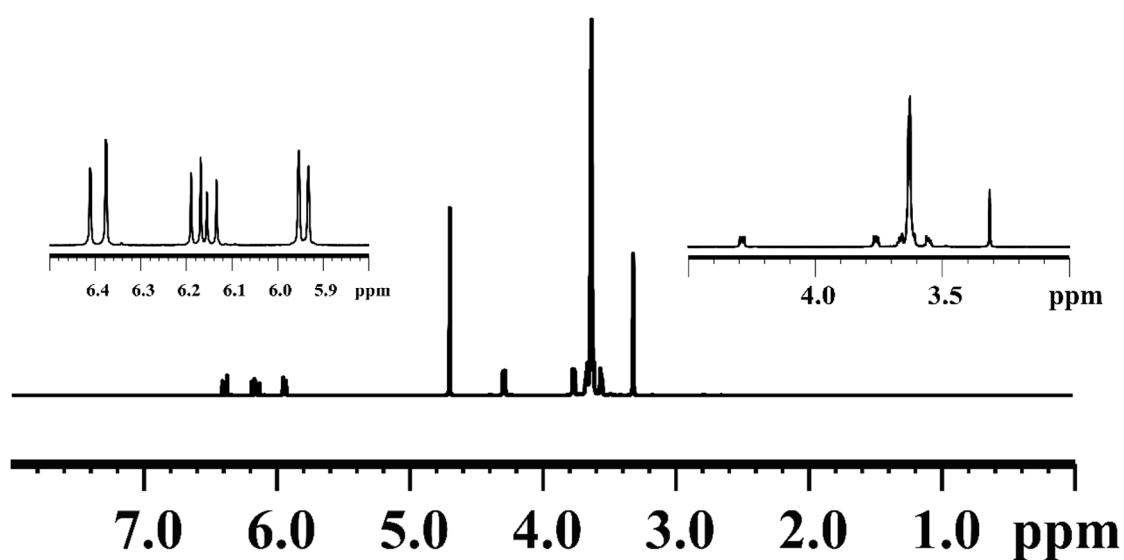Figure S3: The  $^1\text{H}$  NMR spectrum of MEA

## Supplementary S5

The  $^1\text{H}$  NMR spectrum of PMAB gel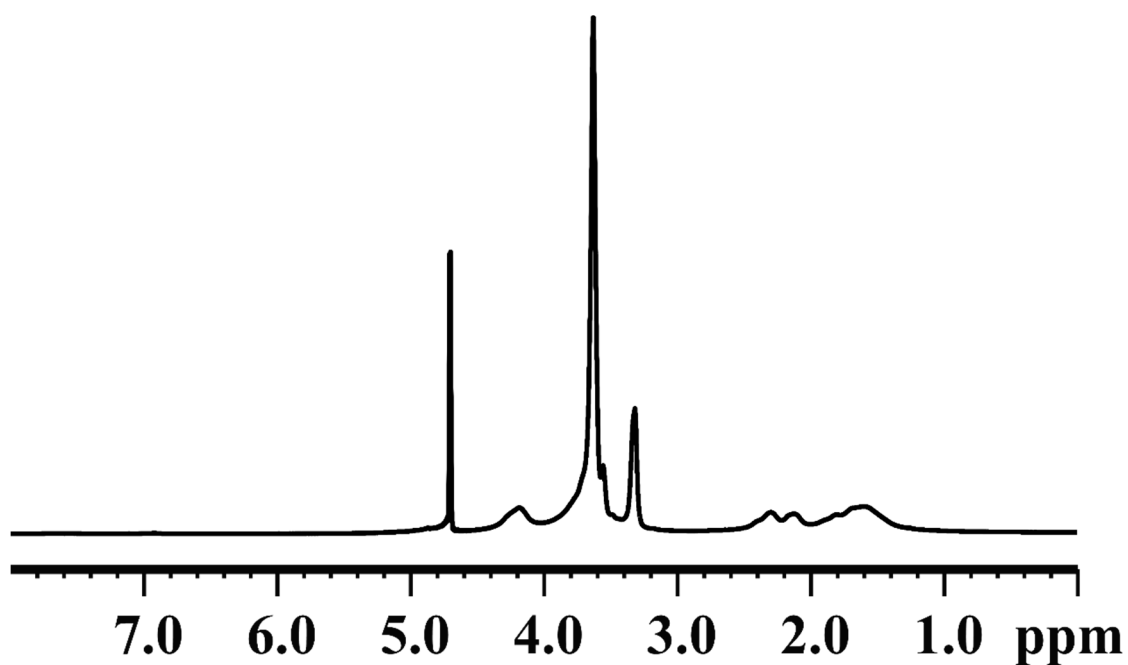Figure S4: The  $^1\text{H}$  NMR spectrum of PMAB gel

## Supplementary S6

The  $^{13}\text{C}$  and DEPT-135° NMR spectrum of gel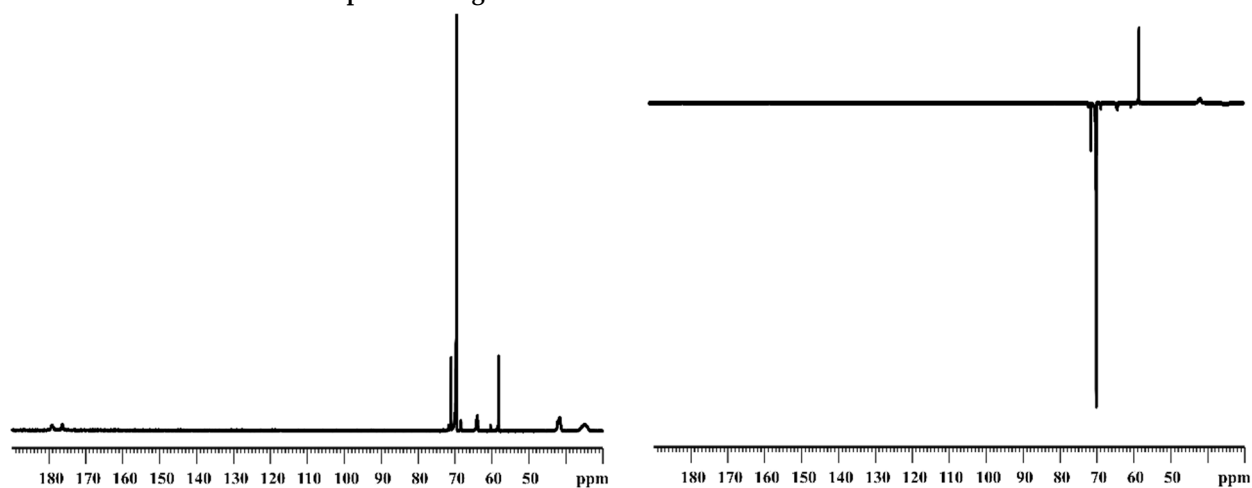Figure S5: The  $^{13}\text{C}$  and DEPT-135° NMR spectra of PMAB gel

## Supplementary S7

The NMR profile spectra of pure PMAB gel without solvent

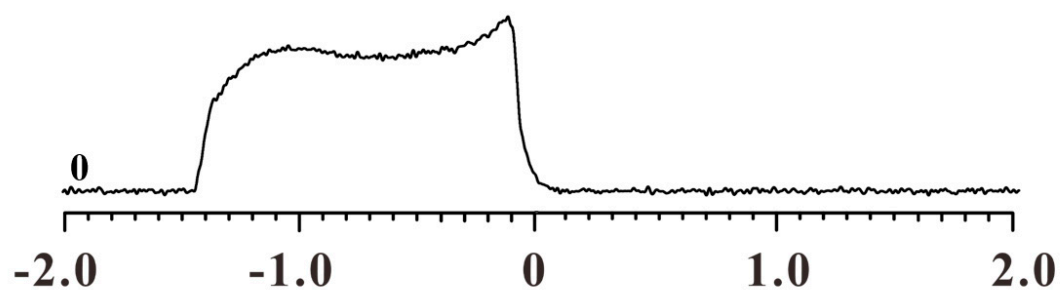

Figure S6: The NMR profile spectra of pure PMAB gel without solvent
